# Supplementary material for: Simultaneous exfoliation and colloidal formation of few-layer semiconducting MoS2 sheets in water
Source: Royal Society of Chemistry journal article supplement (doi:10.1039/c9cc08800h), 2020-01-01
Supplement: c9cc08800h1.pdf [file c9cc08800h1.pdf]

Supporting Information For  
Simultaneous Exfoliation and Colloidal Formation of Few-Layer  
Semiconducting MoS<sub>2</sub> sheets in Water

Xutao Wu,<sup>a</sup> Yuan Li,<sup>a</sup> Libo Chen,<sup>b</sup> Jie Zhao,<sup>b</sup> Biao Wu,<sup>a</sup> Zhi-Bin Zhang<sup>a,b\*</sup>

<sup>a</sup> Key Laboratory of Synthetic and Natural Functional Molecule Chemistry of the Ministry of Education, College of Chemistry and Materials Science, Northwest University, 710069 Xi'an, People's Republic of China

<sup>b</sup> Division of Solid-State Electronics, Department of Engineering Sciences, Uppsala University, SE-751 21 Uppsala, Sweden

## Experimental Section

**Material preparation.** Molybdenum (IV) sulfide ( $\text{MoS}_2$ ) powder, tungsten sulfide ( $\text{WS}_2$ ) powder and Molybdenum Selenide ( $\text{MoSe}_2$ ) powder from Alfa, 1-pyrenebutyric acid and sodium hydroxide from Innochem and tetrabutylammonium hydroxide solution from Sigma-aldrich were used as-received. The preparation process started by mixing the 1-pyrenebutyric acid and sodium hydroxide with 30 mL distilled water to produce 1-pyrenebutyric acid sodium salt (PyB-Na) in 500 mL glass beaker. When we used 1 mmol/mL tetrabutylammonium hydroxide instead, we obtain 1-pyrenebutyric acid tetrabutylammonium salt (PyB-TBA). Then  $\text{MoS}_2$  powder was added into the glass beaker and kept still for 24 h at room temperature for the purpose of intercalation of the PyB molecules. Magnetic stirring for 48 h instead of keeping still for 24 h was used as an optimization. Subsequently, 270 mL distilled water was added into beaker for shear mixing which was performed using a LSM high-shear laboratory mixer from Silverson Machines, in ice-bath. After the mixer was run at 6000 rpm for a given period, the dispersions were kept still for 4 h and the top 200 mL suspension was decanted. The decanted dispersions were centrifuged for 10 min at different centrifugal force, where approximately the top 50% of the supernatant was collected by pipet for spectroscopic characterizations.

**Characterizations.** UV-vis spectra of the exfoliated samples were measured on Agilent Technologies Cary100 Series UV-Vis Spectrophotometer. Scanning electron microscope (SEM) images were collected on a Hitachi SU8010 at 3 kV. High resolution transmission electron microscope (HRTEM) images were collected on a FEI Talos F200X at 200 kV. For the HRTEM measurement a drop of the  $\text{MoS}_2$  dispersion was casted on a holey carbon grid (400 meshes). Atom force microscope (AFM) images were collected in tapping mode to characterize the sheet thickness and size distributions. For AFM measurement, the decanted dispersion was further filtered using a 0.45  $\mu\text{m}$  Nylon (polyamide) membrane to remove extra PyB salt and the flakes remained on the membrane were re-dispersed in water, which was subsequently cast on oxidized silicon and drying on hotplate. Spray-coating was used to deposit the

exfoliated MoS<sub>2</sub> sheets onto the surfaces of a Si/SiO<sub>2</sub> substrate at 105°C. The samples were soaking in DI-water for 15 min after spray-coating and then drying at 120 °C on hot plate. Raman spectroscopy was conducted on a Renishaw Raman spectroscope with laser wavelength of 532 nm and 20× lens. The concentration of exfoliated MoS<sub>2</sub> sheets in the dispersions was determined by drying and weighing. X-ray photoelectron spectroscopy (XPS) and X-ray diffraction (XRD) were employed to characterize the phase of the exfoliated MoS<sub>2</sub> and the role of the PyB salt in the exfoliation.

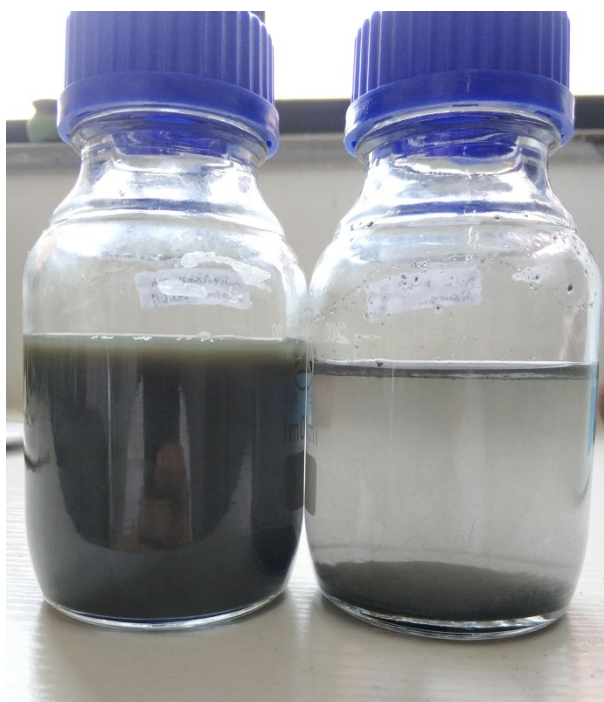

Figure S1. MoS<sub>2</sub> dispersions in water with (left) and without PyB-Na (right) right after shear mixing.

#### S1 Optimization of exfoliation condition

The influences of the dosage of initial MoS<sub>2</sub> powder and the time of shear mixing on the concentration of final MoS<sub>2</sub> dispersion were investigated in detail. Figure S2a and S2b illustrates the influences of initial MoS<sub>2</sub> dosage on the concentration of the final MoS<sub>2</sub> dispersions. The figure in Figure S2a for each line represents the amount

of MoS<sub>2</sub> used. In Figure S2b, the highest concentration of MoS<sub>2</sub> dispersion could be obtained when the amount of the initial dosage of MoS<sub>2</sub> powder were 4.5 g. Similarly, Figure S2c and S2d illustrates the influences of the time of shear mixing. The figure in Figure S2c for each line represents the time of shear. In Figure S2d, the highest concentration of MoS<sub>2</sub> dispersion could be obtained when the time of shear mixing of MoS<sub>2</sub> powder were 3.0 h. Considering the quality of the MoS<sub>2</sub> nanosheets, the MoS<sub>2</sub> nanosheets obtained by shearing 1.0 h were characterized.

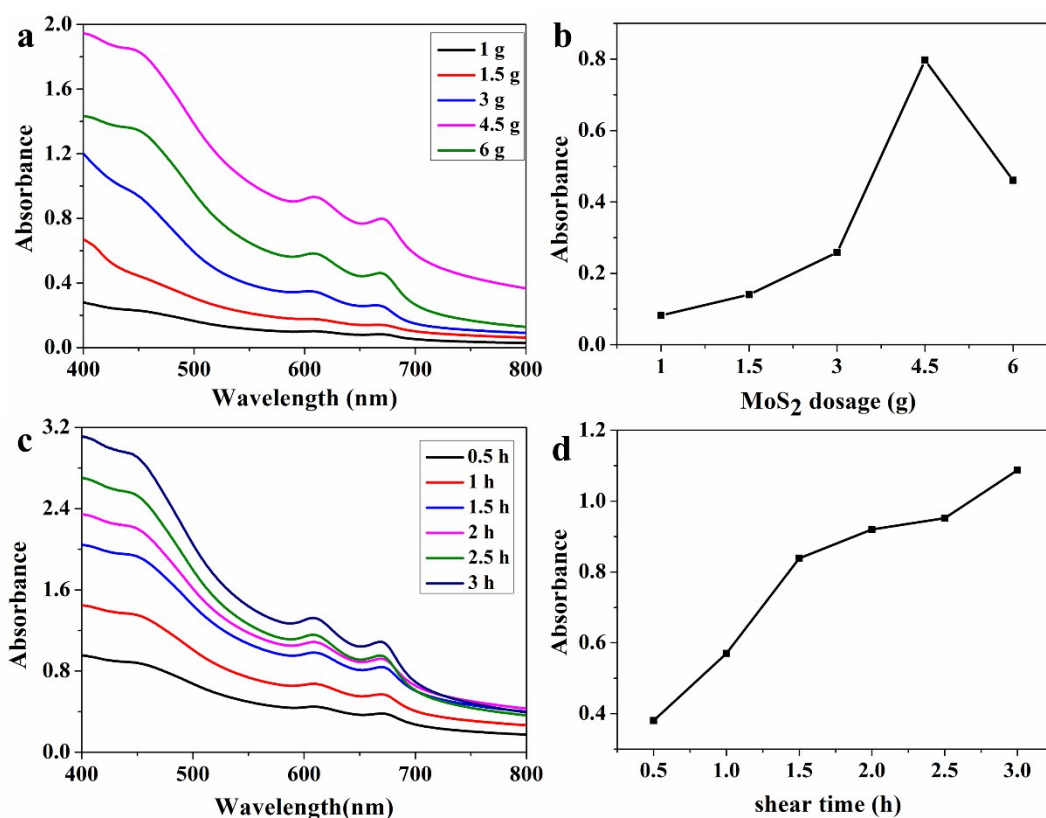

Figure S2. The UV-vis spectra of MoS<sub>2</sub> dispersions in water assisted with different initial dosage of MoS<sub>2</sub> powder and with the different shear time.

## S2 Stability test

Detecting the dependence of concentration on time is a useful method for examine the stability of the MoS<sub>2</sub> nanosheets dispersions. We measured the

absorbance of the dispersions for 32 days with the interval of eight days. Figure S3 shows the concentration retention versus time of the MoS<sub>2</sub> dispersions with PyB-Na. The concentration retained 89% after 32 days. It indicates that these MoS<sub>2</sub> dispersions are stable without significant aggregation at least for one month.

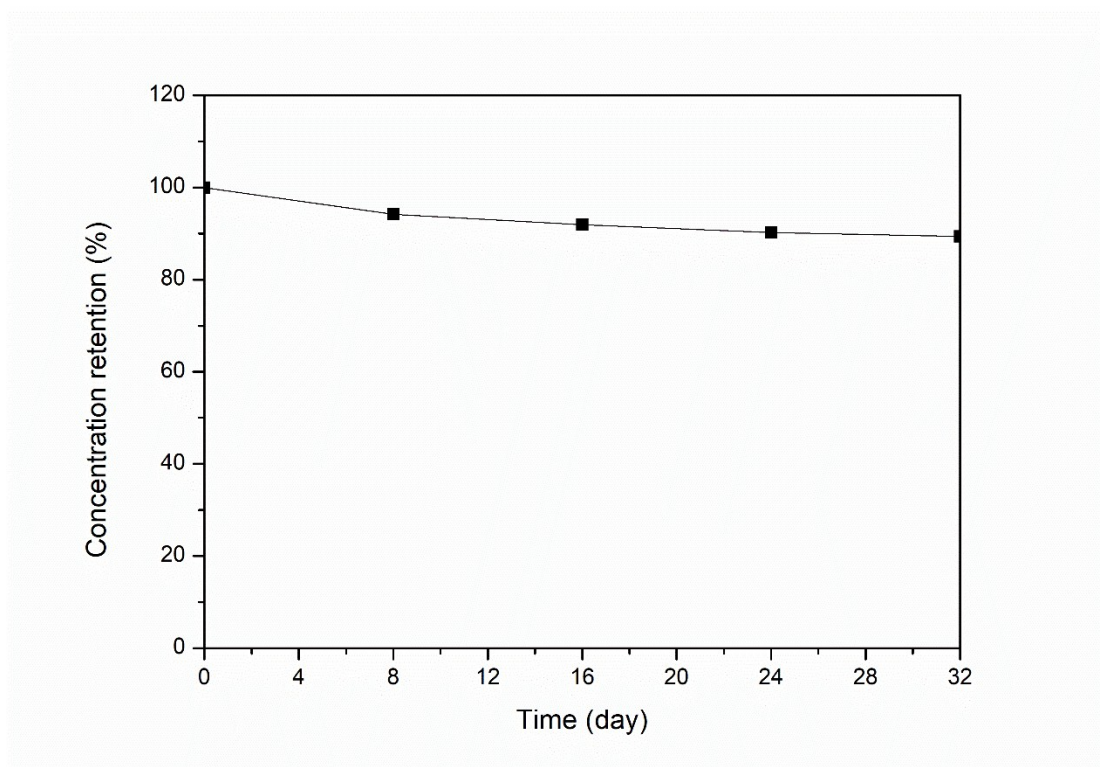

Figure S3. Absorbance retention of MoS<sub>2</sub> dispersions as a function of time

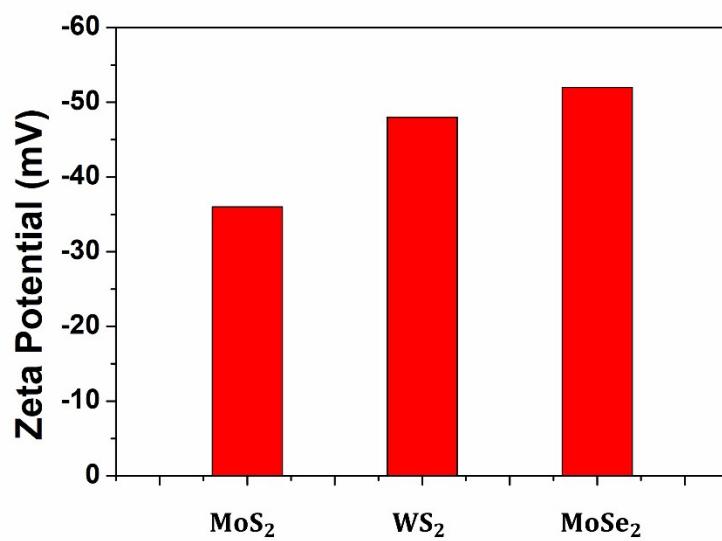

Figure S4. Zeta potential of exfoliated MoS<sub>2</sub>, WS<sub>2</sub> and MoSe<sub>2</sub> sheets in water

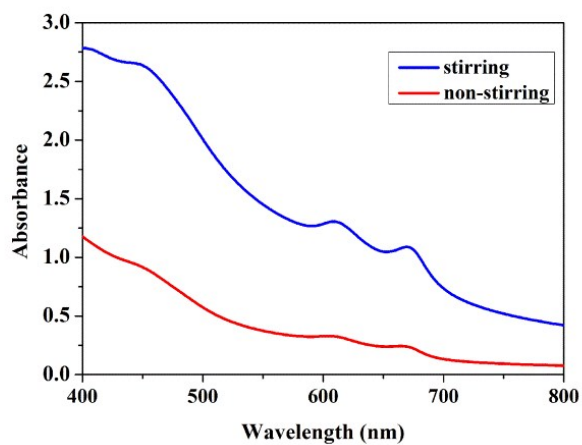

Figure S5. The UV-vis spectra of MoS<sub>2</sub> dispersions in water by previous magnetic stirring (blue), and by previous still standing (red).

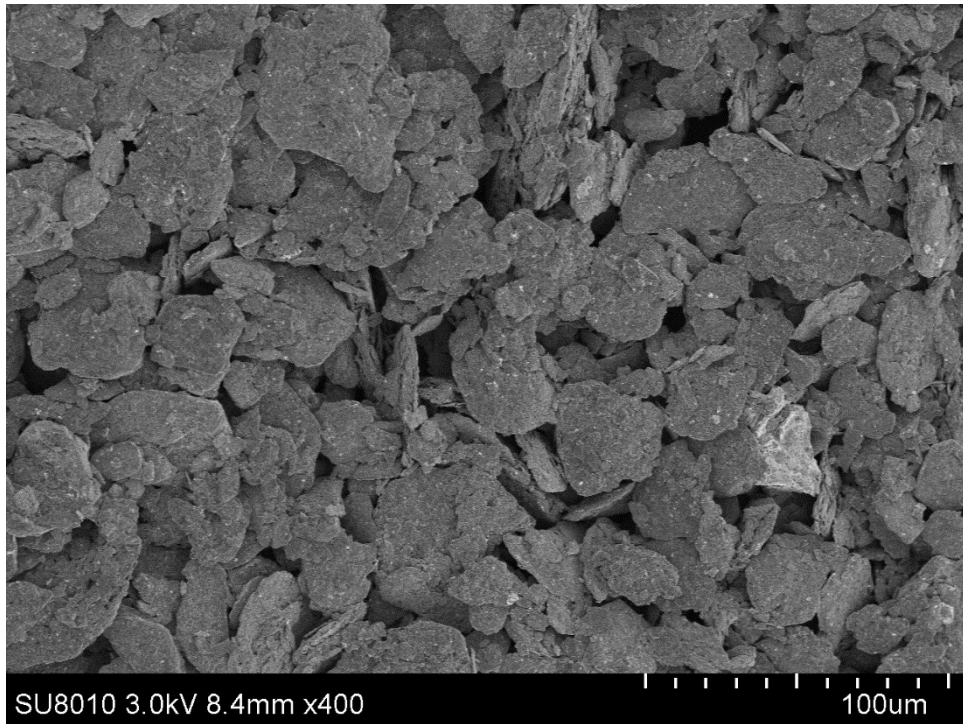

Figure S6. SEM image of bulk MoS<sub>2</sub>

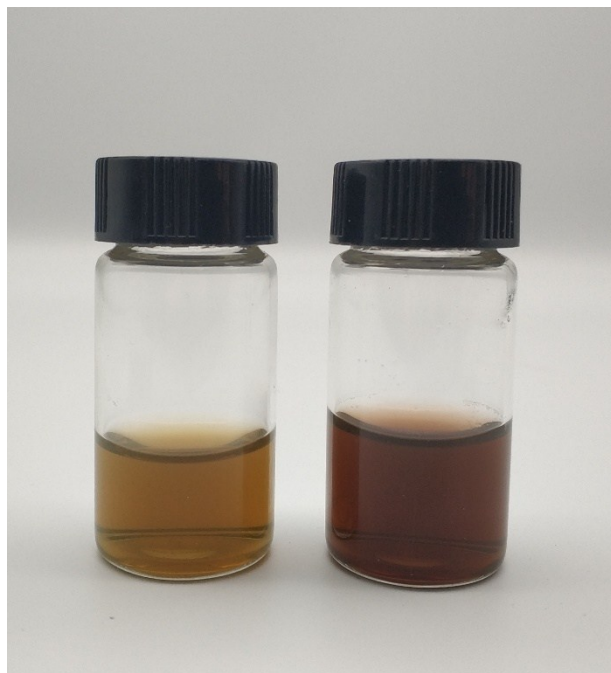

Figure S7. Optical photograph of exfoliated WS<sub>2</sub> (left) and MoSe<sub>2</sub> (right)



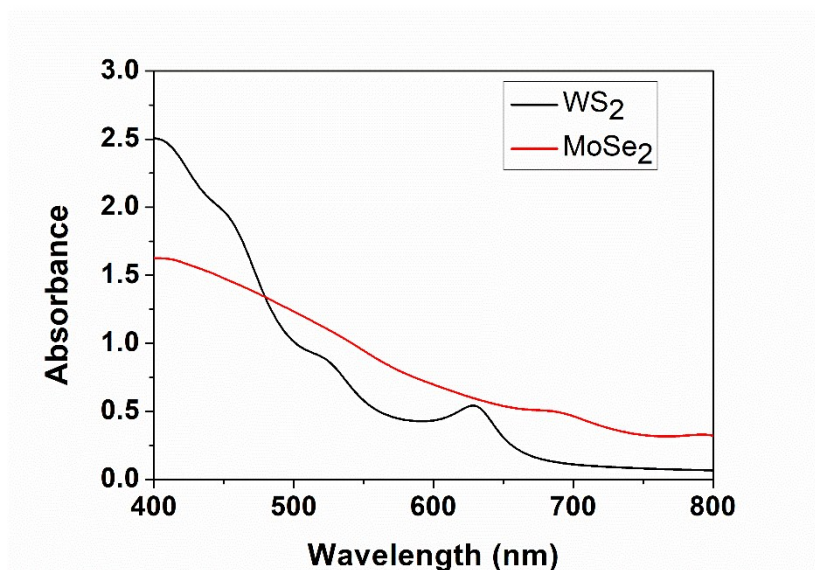

Figure S8. The UV-vis spectra of exfoliated WS<sub>2</sub> and MoSe<sub>2</sub>
